1 **TITLE**

2 Effectiveness and Cost-Effectiveness of TeleStroke Consultations to Support the Care of Stroke  
3 Patients Presenting to Regional Emergency Departments in Western Australia: An Economic  
4 Evaluation Case Study Protocol

5

6 Christina Tsou\*, Curtin University, Kent Street, Bentley, Perth, WA, 6102.  
7 [Christina.tsou@curtin.edu.au](mailto:Christina.tsou@curtin.edu.au) (corresponding author)

8 Suzanne Robinson, Curtin University, Kent Street, Bentley, Perth WA, 6102.  
9 [Suzanne.robinson@curtin.edu.au](mailto:Suzanne.robinson@curtin.edu.au)

10 James Boyd, La Trobe University, Plenty Rd & Kingsbury Dr, Bundoora VIC 3086.  
11 [James.Boyd@latrobe.edu.au](mailto:James.Boyd@latrobe.edu.au)

12 Shruthi Kamath, WA Country Health Service, 189 Wellington Street, Perth, WA, 6000.  
13 [shruthi.kamath@health.wa.gov.au](mailto:shruthi.kamath@health.wa.gov.au)

14 Justin Yeung, WA Country Health Service, 189 Wellington Street, Perth, WA, 6000.  
15 [Justin.Yeung@health.wa.gov.au](mailto:Justin.Yeung@health.wa.gov.au)

16 Stephanie Waters, WA Country Health Service, 189 Wellington Street, Perth, WA, 6000.  
17 [Stephanie.Waters@health.wa.gov.au](mailto:Stephanie.Waters@health.wa.gov.au)

18 Karen Gifford, WA Country Health Service, 189 Wellington Street, Perth, WA, 6000.  
19 [Karen.Gifford@health.wa.gov.au](mailto:Karen.Gifford@health.wa.gov.au)

20 Andrew Jamieson, WA Country Health Service, 189 Wellington Street, Perth, WA, 6000.  
21 [Andrew.Jamieson@health.wa.gov.au](mailto:Andrew.Jamieson@health.wa.gov.au)

22 Delia Hendrie, Curtin University, Kent Street, Bentley, Perth WA, 6102.  
23 [D.V.Hendrie@curtin.edu.au](mailto:D.V.Hendrie@curtin.edu.au)

24

25 Word count: 5038

26 Abstract word count: 394

27

## 1 ABSTRACT

2 **Introduction:** The Western Australia Acute TeleStroke Programme commenced incrementally  
3 across regional Western Australia (WA) during 2016-2017. Since the introduction of the  
4 TeleStroke Programme, there has been monitoring of service outputs including regional patient  
5 access to tertiary stroke specialist advice and reperfusion treatment, however, the impact of  
6 consultation with a stroke specialist via telehealth (videoconferencing or telephone) on the  
7 effectiveness and cost-effectiveness of stroke care, and the drivers of cost-effectiveness has not  
8 been systematically evaluated.

9 **Methods and Analysis:** The aim of the case study is to examine the impact of consultation with  
10 a stroke specialist via telehealth on the effectiveness and cost-effectiveness of stroke and TIA  
11 care using a mixed methods approach. A categorical decision tree model will be constructed in  
12 collaboration with clinicians and programme managers. A before and after comparison using  
13 State-wide administrative datasets will be used to run the base model. If sample size and  
14 statistical power permits, the cases and comparators will be matched by stroke type and  
15 presence of CT scan at the initial site of presentation, age category and presenting hospital. The  
16 drivers of cost-effectiveness will be explored through stakeholder interviews. Data from the  
17 qualitative analysis will be cross-referenced with trends emerging from the quantitative dataset  
18 and used to guide the factors to be involved in sub-group and sensitivity analysis.

19 **Ethics and Dissemination:** Ethics approval for this case study has been granted from the WACHS  
20 Human Research and Ethics Committee (RGS3076). Reciprocal approval has been granted from  
21 Curtin University Human Research Ethics Office (HRE2019-0740). Findings will be disseminated  
22 publicly through conference presentation and peer-review publications. Interim findings will be  
23 released as internal reports to inform the service development.

### 24 **Strengths and Limitations of This Study:**

- 25 • Comparison of the impact of stroke specialist consultation via telehealth in regional  
26 Australia in supporting the management of different stroke subtypes
- 27 • The decision tree model will be constructed in collaboration with clinicians and  
28 programme administrators directly involved in the delivery of the TeleStroke  
29 Programme
- 30 • Use of local administrative data as model inputs enables the base model to reflect the  
31 reality of the regional WA Health service delivery
- 32 • Collaboration with WA Health stakeholders involved in TeleStroke Programme design  
33 and implementation to optimise utility of the case study to inform service development  
34 and expansion
- 35 • Conversion of the functional outcome modified Rankin Scale score (mRS) to quality  
36 adjusted life years (QALY) relies on national or international averages

37 **Key Words:** TeleStroke, clinical effectiveness, cost-effectiveness, rural and remote health

38

## 1 INTRODUCTION

2 Advances have been made in acute stroke management in recent years enabling ischaemic  
3 stroke patients to experience significant improved function and recovery post stroke<sup>1</sup>. The  
4 Western Australia Acute TeleStroke Programme commenced incrementally across regional  
5 Western Australia (WA) during 2016-2017. Since commencement, the number of WA rural  
6 patients receiving stroke reperfusion treatment that is mechanical thrombectomy (MT) and/or  
7 thrombolysis has increased across regional WA. Since the introduction of the TeleStroke  
8 Programme, there has been monitoring of service outputs including regional patient access to  
9 tertiary stroke specialist advice and reperfusion treatment, however, the impact of consultation  
10 with a stroke specialist via telehealth on the effectiveness and cost-effectiveness, and the drivers  
11 of cost-effectiveness has not been systematically studied.

12 The current body of knowledge on the effectiveness and cost-effectiveness of the telestroke  
13 services in rural and remote emergency departments (EDs) focuses on acute ischaemic stroke  
14 and the impact of telestroke on timely administration of thrombolysis and associated hospital  
15 resource use including inter-hospital transfers avoided. The studies have found telestroke to  
16 improve accuracy in decision making compared to telephone<sup>2</sup> and to increase safe local  
17 administration of thrombolysis<sup>3</sup> with similar results to patients presenting directly to the tertiary  
18 stroke centres<sup>4</sup>. However, moderate to severe ischaemic stroke patients treated with  
19 thrombolysis may potentially benefit from care at a tertiary stroke centre<sup>5</sup>. Hence local  
20 thrombolysis administration does not completely mitigate the need for tertiary centre care. In  
21 addition, the increased accuracy in decision making also means that patients presenting to rural  
22 hospitals with more severe stroke (large vessel occlusion) who later transfer to tertiary hospitals  
23 can have equitable outcomes to patients who presented directly to the tertiary centre<sup>6</sup>.  
24 Effectiveness studies typically focus on ischaemic stroke patients. The pattern and impact of  
25 telestroke access to haemorrhagic stroke, transient ischaemic attacks (TIAs) and stroke mimics  
26 from ED presentation to discharge is not well documented in the literature.<sup>7</sup>

27 Medeiros De Bustos et al have recently observed that majority of telestroke studies concerns  
28 acute management<sup>8</sup>. There have been few socioeconomic studies to determine the true impact  
29 of telestroke in medical and economic terms<sup>8</sup>. There is also much to add to the literature on the  
30 association of patient outcome at discharge and in the longer term for each stroke subtypes to  
31 health systems cost.

32 Despite Whetten et al and Demaerschalk et al estimating telestroke access to be the dominant  
33 strategy compared to no access, the results are only valid when a long list of assumptions hold  
34 true<sup>7,9</sup>. Cost-effectiveness analysis on rural and remote telestroke programmes to date have  
35 used effectiveness measures from previous clinical trials adjusted to a specific setting (e.g. ED),  
36 based on resource utilisation data obtained from published literature or publicly available data<sup>7</sup>  
37 <sup>9-11</sup>. These studies make assumptions or estimates from multiple data sources or rely on clinical  
38 expert opinions on activity variables such as probability of transfer to tertiary centres, discharge  
39 destination, and key resource utilisation variables such as cost of telestroke equipments<sup>10,11</sup>.  
40 These economic models have not taken into account haemorrhagic stroke or TIA patients who  
41 may benefit from telestroke<sup>10</sup>, and did not consider secondary benefits of acute telestroke  
42 access on resource utilisation required within subacute episode of care following stroke and TIA<sup>11</sup>.

1 This study uses the TeleStroke Programme in Western Australia as a case study to examine the  
2 effectiveness and cost-effectiveness of telehealth to support the care of patients presenting to  
3 regional emergency departments in Western Australia. The primary interest in this research is  
4 twofold. Firstly, to understand the effectiveness and cost-effectiveness of the TeleStroke based  
5 on its current operation. Secondly, to gain insight into the drivers of cost-effectiveness of the  
6 service to inform future expansion of the TeleStroke Programme. The following research  
7 questions will be addressed:

- 8 1. Is seeing a stroke specialist via telehealth more effective and cost-effective than no stroke  
9 specialist involvement for patients presenting to rural and remote hospitals?
- 10 2. What are the drivers of cost-effectiveness in the above scenarios?
- 11 3. What factors other than access to stroke specialists via telehealth affect the clinical  
12 outcomes for patients presenting to a WACHS site with and without access to computed  
13 tomography (CT)?
- 14 4. What is the acceptability of stroke specialist consultation via telehealth to health  
15 professionals and health consumers and how do the enablers and barriers to its  
16 implementation help to explain the findings from the cost-effectiveness analysis?

## 17 **METHODS AND ANALYSIS**

18 A mixed methods methodology will be used to allow incorporation of health care complexities  
19 into a systematic understanding of the factors that influence health service provision <sup>12</sup>. A mixed  
20 methods approach is frequently used in health services research to allow quantitative data from  
21 survey and administrative records to combine with contextual information from qualitative data  
22 collections to support a better-informed decision about health service delivery. Guided by the  
23 model for assessment of telehealth (MAST)<sup>13</sup>, this case study will use a sequential explanatory  
24 design <sup>14</sup>, with a combination of the methods described below . That is, the case study will  
25 commence with an economic evaluation of the TeleStroke Programme (quantitative phase) ,  
26 then conduct an analysis of its implementation which will be guided by a modified consolidated  
27 framework for implementation research (mCFIR) (qualitative phase), followed by the combined  
28 interpretation of the findings from the two phases of analysis to understand the drivers of cost-  
29 effectiveness.

30 The WA acute TeleStroke Programme industry stakeholders have been engaged in the design of  
31 the economic evaluation to incorporate current process of care into the case study to ensure the  
32 outcomes measured in this study are meaningful to future development of the programme. A  
33 quantitative assessment will be conducted on the effectiveness of stroke specialist consultation  
34 via telehealth on alignment to clinical protocols to achieve desirable clinical outcome, improved  
35 functional outcome for patients, and the impact of consultation with TeleStroke specialist on the  
36 diagnosis of stroke. Descriptive output from this analysis will also provide model input into the  
37 economic model.

38 A decision tree analytic model will be built to inform the calculation of the incremental cost-  
39 effectiveness ratio (ICER) for the three types of stroke presentations: haemorrhagic stroke, acute  
40 ischaemic infarction (AIS) and TIA when a TeleStroke specialist consultation has taken place.  
41 Complementing this information will be a novel qualitative data collection from relevant  
42 clinicians, health professionals, and policy makers to understand factors associated with  
43 implementation of TeleStroke Programme across WACHS facilities. In the explanatory phase,

1 knowledge generated from the various parts of the research will be triangulated to help interpret  
2 the results and the effectiveness and cost-effectiveness analysis. This process will also contribute  
3 to improving the process of service delivery. Figure 1 presents a schematic diagram of the study  
4 methodology for the WA Acute TeleStroke case study.

## 5 **Case Study Settings**

6 Medical emergencies in rural and remote Western Australia typically present to one of the  
7 WACHS facilities covering 2.5 million square kilometres. There are 12 sites across WACHS with  
8 computed tomography capabilities (CT sites) and 108 non-CT sites including 15 District Health  
9 Services, 49 small hospitals, 24 nursing posts / health centres, and 20 Aboriginal Community  
10 Clinics. Three geographically defined regional-metropolitan stroke pathways have been  
11 endorsed in WA linking WACHS facilities with partnered metropolitan acute stroke units. All  
12 WACHS emergency medical services are evaluated against the Emergency Care Capability  
13 Framework (ECCF) as the minimum requirements for role delineation capability and the  
14 minimum requirements to support the service.

## 15 **Administrative Data Collections**

16 Six of the 12 CT sites across WACHS currently upload data to the WA Acute Stroke Data Collection  
17 (WAASDC). In this exploratory economic analysis, only sites contributing data to the WAASDC  
18 will be included. Learnings from this analysis will inform future economic evaluation designs  
19 across all WACHS sites. The WAASDC is a local file audit of stroke related indicators including  
20 whether a TeleStroke specialist was consulted. Other process-related indicators are available  
21 from the WACHS emergency department data collection (EDDC) and for admitted patients from  
22 the hospital morbidity data collection (HMDC), which are both routinely collected administrative  
23 datasets. By linking the three data sets, patients' journey between WACHS hospitals will be  
24 studied.

25 To understand the patients journey to tertiary/quaternary care at other large or metropolitan  
26 sites, linkage to tertiary centre ED and admitted datasets will be done using patient identifier  
27 and date and time of discharge from WACHS hospital. The patient unique identifier will also be  
28 used to extract time and date of death from the State's mortality data collection.

## 29 **Stroke case identification in the clinical process – an ICD-10 analysis**

30 All stroke cases will be followed from the time of presentation to ED to the point of discharge  
31 from hospital. In-hospital stroke of admitted patients or admitted patients by-passing the ED will  
32 also be included in this analysis.

33 Stroke or TIA cases from the HMDC will be traced back to the EDDC to identify the principal  
34 diagnosis at ED. A separate stroke care audit was conducted on patients with established stroke  
35 or TIA diagnosis in the WAASDC. Patients identified as stroke or TIA cases in the EDDC but who  
36 were either discharged home or transferred to a tertiary centre for further treatment will be  
37 included as stroke cases. Those receiving consultation by a TeleStroke specialist after 1 January  
38 2017 will be identified as cases and those presenting before 1<sup>st</sup> of January 2016 are comparators.  
39 A 12 months window periods is to allow for data stabilisation. Descriptive analysis will then be

1 performed on the cases and comparator subsets to provide model inputs to the cost-  
2 effectiveness analysis.

3 A subset of patients who have a stroke or TIA diagnosis recorded in the HMDC with a non-  
4 stroke/TIA diagnosis in EDDC will be extracted for analysis with presenting symptoms and  
5 whether consultations with TeleStroke specialists took place. This will give an understanding of  
6 the impact of TeleStroke on the diagnosis of Stroke in stroke patients' hospital journey. The  
7 proportion of each type of change in diagnosis from EDDC to HMDC will be calculated and  
8 compared between the cases and comparator groups. This subset of patients will also be  
9 included as stroke cases for this analysis.

## 10 **Cost-effectiveness Analysis**

11 Figure 2 summarises the components of the WA Acute TeleStroke Case Study. This study will use  
12 a decision tree analytic model to examine the incremental cost-effectiveness comparing the  
13 acute stroke care supported by TeleStroke consultations to acute stroke care prior to the  
14 implementation of the Acute TeleStroke Programme. The incremental cost-effectiveness ratio  
15 (ICER) will be calculated to determine the cost of increasing mRS by one unit, and another set of  
16 ICERs for cost per quality adjusted life year (QALY). Sub-group and sensitivity analysis will be  
17 performed to understand the drivers of cost-effectiveness and interpreted together with the  
18 qualitative data collection in the triangulation phase.

### 19 **Time horizon**

20 There are three critical point in time for outcome determination in this study. Firstly, pre-  
21 intervention mRS to capture the functional status before thrombolysis or mechanical  
22 thrombectomy (MT). Secondly, at discharge, and finally at 90 to 180 days post discharge. The  
23 overall effectiveness of the stroke specialist telehealth consultations is determined by examining  
24 the change in functional status between pre-intervention and 90 to 180 days post discharge. The  
25 functional status at discharge is significant in examining whether the patient returned to the  
26 same functional state prior to the index stroke by comparing with pre-morbid mRS.

27 The WA Acute stroke pathways aligning the seven WACHS regions to tertiary hospitals  
28 commenced on the 1<sup>st</sup> of January 2016. Patients presenting to WACHS ED from this point  
29 onwards can receive consultation from TeleStroke specialists. To allow a 12-month time window  
30 for data stabilisation, TeleStroke case selection will commence 12 months after the relevant site  
31 commence uploading to the WAASDC. The comparator selection will be from December 2015 to  
32 the earliest available records for the ED and HMDC data collections. This time horizon will be  
33 related to both the cost and effectiveness data collection.

### 34 **Study perspectives**

35 The analysis in this study will take the WACHS and WA public health systems perspectives by  
36 combining Country WA and metropolitan public hospital service utilisations, including  
37 TeleStroke Services, stroke unit care and neurological interventions.

### 38 **The intervention and comparator**



1 The study intervention in this study is stroke specialist consultation via telehealth. This is one  
2 component of the overall TeleStroke Programme. Given that TeleStroke consultations have been  
3 embedded within clinical workflows and processes, a contemporaneous non-Telestroke  
4 comparator group within hospital sites in this study would be subjected to selection bias with  
5 more TeleStroke use in higher acuity presentations. This, in addition to the vast geographical and  
6 community variations across WACHS regions, makes a contemporaneous comparator for the  
7 case study sites not feasible. Therefore, a pre and post study design is appropriate.

8 Index presentation and stroke case identification

9 Index presentations will be identified using the principal discharge diagnosis (ICD-10) from the  
10 WACHS ED and all diagnosis fields from the admitted data collections. Table 1 shortlists the ICD  
11 codes to be used to identify stroke presentations. Activity level model input to reflect care  
12 pathway will be collected from multiple data sources including the EDDC and HMDC and the  
13 WAASDC. Model inputs from the local data collections will be supplemented by the probability  
14 from the Australian Stroke Clinical Registry (AuSCR) or international averages published in peer  
15 reviewed literature to complete model inputs.

16 **Table 1 Stroke and Transient Ischaemic Attack ICD-10-AM Sub-Classifications**

| Disease | Sub-category<br>(ICD-10-AM sub-classifications)    | ICD-10-AM                    |
|---------|----------------------------------------------------|------------------------------|
| Stroke  | Intracerebral haemorrhage                          | I61.0 – I61.6, I61.8 – I61.9 |
|         | Other non-traumatic intracranial haemorrhage       | I62.9                        |
|         | Cerebral infarction                                | I63.0 – I63.6, I63.8 – I63.9 |
|         | Stroke, not specified as haemorrhage or infarction | I64                          |
| TIA     | Transient cerebral ischaemic attacks, unspecified  | G45.9                        |

17 Decision model development

18 A categorical decision tree model will be developed in collaboration with WACHS clinicians and  
19 programme administrators capturing probabilities and decisions from WACHS ED presentation  
20 to the point of discharge from hospital. The modified Rankin Scale (mRS) at discharge will be the  
21 final outcome in the decision tree model. Time critical clinical outcomes (see outcome  
22 determination section below) will be used in a sensitivity analysis in the assessment of drivers of  
23 cost-effectiveness. Transition probabilities from presentation to a WACHS ED to discharge will  
24 come from the WACHS administrative datasets. The decision tree will be constructed by asking  
25 the following questions:

- 26
- 27 • Did a TeleStroke consult take place?
  - 28 • Was there a bleed into the brain? (haemorrhagic vs non-haemorrhagic stroke)
  - 29 • Was a major cerebral blood vessel blocked i.e. large vessel occlusion?
  - 30 • Was the blood clot removed? (mechanical thrombectomy (MT) v no MT)
  - Was treatment given to break up the blood clots? (thrombolysis v no thrombolysis)

- 1 • Did transfer to a tertiary centre take place? (transferred v admitted locally or managed
- 2 locally)
- 3 • Were there complications associated with the treatment? (Intracerebral Haemorrhage
- 4 (ICH) v no ICH)
- 5 • What was the functional status of the patient upon discharge and 90-180 days post
- 6 discharge? (Modified Rankin Scale (mRS) cores 0-2 v 3-5 v 6)

7 Identification, measurement and valuation of resource use

8 Cost model calculations will be based on WA Health service and resource utilisation relating to  
 9 the initial hospital presentation for stroke or TIA from presentation to hospital discharge, and  
 10 from hospital discharge to 90-180-day post hospital discharge. Table 2 summarises the cost  
 11 items.

12 **Table 2 Cost Items for the WACHS Acute TeleStroke Case Study**

| Perspectives                                         | Health Systems Perspective                                                                                                                                                |                                                                                                                                   |
|------------------------------------------------------|---------------------------------------------------------------------------------------------------------------------------------------------------------------------------|-----------------------------------------------------------------------------------------------------------------------------------|
|                                                      | WACHS                                                                                                                                                                     | WA Health                                                                                                                         |
| <b>Capital costs</b>                                 | IT equipment                                                                                                                                                              | IT equipment                                                                                                                      |
| <b>Programme set up cost</b>                         | WACHS acute stroke programme costs                                                                                                                                        | WA Stroke Services Project (WASSP) costs                                                                                          |
| <b>Direct health care costs</b>                      | ED service delivery cost<br>Hospital admission and rehabilitation cost<br>(include all direct patient care plus overheads comprising hospital, region and central office) | ED service delivery cost<br>Hospitalisation admission and rehabilitation cost<br>(include all direct patient care plus overheads) |
| <b>Direct non-health care costs (overhead costs)</b> | Overheads comprising hospital, region and central office.                                                                                                                 | Hospital overheads.                                                                                                               |

13 *Measuring Resource Use*

14 Service cost will be collected from the WA Health costing system. The resource use will be built  
 15 around individual patient encounters for the WACHS activity-based sites, these are the regional  
 16 resource centres (RRC) and the district health services (DHS). All CT sites are either situated  
 17 within a RRC or DHS therefore it is possible to build cost around individual patient encounters.  
 18 Using the encounter identifier will allow integration of component direct health care costs  
 19 supporting the episode of service delivery, and can potentially identify the breakdown of costs  
 20 associated with the encounter including inpatient admissions, theatre and diagnostics services.

21 *Valuing Resource Use*

22 Unit cost data is available up to the 2018-19 financial year and all monetary values will be  
 23 expressed in Australian dollars (AU\$). All costs will be adjusted to mid-2018 value.

24 TeleStroke Programme costs will be evenly spread over the years since commencement of the  
 25 WA Acute TeleStroke Programme. These include funding for tertiary specialists, project support  
 26 and data collection through the Western Australia Stroke Services Project (WASSP). It will not be



1 meaningful to apply an annual discount for programme costs as only two years of programme  
2 cost will be collected. ICT equipment costs will be depreciated on a straight line over their  
3 estimated useful lives.

#### 4 Outcome Determination

##### 5 *Time Sensitive Measures*

6 Stroke care is time sensitive, hence several time sensitive measures will be used to reflect the  
7 effectiveness of stroke protocol implementation with potential impact on patient outcome. Time  
8 sensitive measures showing strong association to functional outcomes for stroke patients will be  
9 identified as time-critical clinical effectiveness measures and used as a surrogate clinical outcome  
10 measure.

11 Door to imaging time indicates adherence to stroke care protocol, and door to first medical or  
12 nursing review, and door to TeleStroke consultation can impact patient outcome; while the  
13 length of hospital stay can reflect patient outcome and also goes directly to resource use. Onset  
14 to imaging time and onset to first medical or nursing review are the more clinically significant  
15 indicators; however, time of onset may not be accurately determined and it is expected that the  
16 time from onset analysis will be performed on a smaller subset of samples. Timely administration  
17 of thrombolysis to patients with ischaemic stroke is another significant factor impacting on  
18 patient outcome. This will be incorporated into the analysis if there is sufficient sample size for  
19 effectiveness analysis.

20 Clinical Interventions in haemorrhagic stroke are control of blood pressure and hemicraniectomy.  
21 Hemicraniectomy in WA will require transfer to a tertiary centre. Shorter door to tertiary centre  
22 transfer will be a meaningful time-critical clinical effectiveness measure. This will need to be  
23 interpreted in tandem with [regional ED] door to [tertiary centre] hemicraniectomy time to  
24 incorporate variations in transfer time (time transfer out of regional hospitals to arrival time at  
25 tertiary centre), and tertiary centre care.

##### 26 *Functional Outcome Measure*

27 This study will use the modified Rankin Scale (mRS) score as the main functional outcome  
28 measure. A mRS score of 1-2 is considered a good functional outcome from stroke <sup>5,9</sup>, mRS score  
29 of 6 is death, while mRS score of 3-5 indicates mild to severe disability / dependency requiring  
30 provision of carer support. This indicates costs occurring outside of hospital system, including  
31 inability to be employed and loss of productivity to society. Table 3 provides descriptions for the  
32 mRS scores.

#### 33 **Table 3 Modified Ranking Score (mRS) Descriptions**

| Score | Description                                                                                                           |
|-------|-----------------------------------------------------------------------------------------------------------------------|
| 0     | No symptoms at all                                                                                                    |
| 1     | No significant disability despite symptoms; able to carry out all usual duties and activities                         |
| 2     | Slight disability; unable to carry out all previous activities, but able to look after own affairs without assistance |
| 3     | Moderate disability; require some help, but able to walk without assistance                                           |

|   |                                                                                                                           |
|---|---------------------------------------------------------------------------------------------------------------------------|
| 4 | Moderate severe disability; unable to walk without assistance and unable to attend to own bodily needs without assistance |
| 5 | Severe disability; bedridden, incontinent and require constant nursing care and attention                                 |
| 6 | Dead                                                                                                                      |

1 The mRS score at discharge for patients presenting to WACHS ED prior to January 2020 will be  
2 retrospectively determined from discharge summary audits independently conducted by the  
3 WACHS Rural TeleStroke Neurology Fellow and WACHS TeleStroke Programme Manager and  
4 WACHS TeleStroke Programme Research Support Officer, who will discuss any discrepancies in  
5 scores to reach a consensus score. Similarly, the 90-180 day mRS for patients presenting to  
6 WACHS ED prior to January 2020 will be determined from subsequent public hospital utilisation  
7 audits.

8 The discharge destination rule in Nelson<sup>10</sup> will not be followed in this case study because  
9 anecdotal observation of WACHS patients indicate that patients who are discharged to  
10 residential aged care facility (RACF) are more likely to stay the same or deteriorate, while patient  
11 discharge home may improve with further rehabilitation. Nelson<sup>10</sup> applies the following rules to  
12 determine the 90-180 day mRS score for patients who have not been readmitted to the public  
13 hospital system post discharge from index episode. The initial mRS score was assumed to  
14 improve by 1 point at 90 days for patients who were discharged from hospital to rehabilitation  
15 in the community. The initial mRS score was assumed to not change in patients who were  
16 discharged either home or to RACF<sup>10</sup>. Across WACHS, if a patient is discharged to rehabilitation,  
17 majority in outpatient services, they may have improvement in mRS at 90-180 days. If the  
18 rehabilitation is provided by WA Health, mRS may be extracted from the patient's medical record.  
19 For patients who have no further health system intervention post discharge, this study assumes  
20 that their mRS remains unchanged; however, there is also the possibility that they access non-  
21 WA Health rehabilitation and mRS improves. Deterioration may be marked by subsequent WA  
22 Health hospital admission.

### 23 *Quality Adjusted Life Years (QALY) Estimation*

24 This study will use the 90-180 day mRS score to estimate quality adjusted life years (QALY) gained  
25 for the above TeleStroke scenarios<sup>7 9 10</sup>. QALY will be calculated using years of life remaining for  
26 each mRS at 6 months multiplied by utility weight sourced from CEA registry and their resulting  
27 sources<sup>7 15-17</sup>. The years of life remaining will be sourced from WACHS administrative data  
28 collections supplemented by national averages from AuSCR or previous studies<sup>18</sup>. Utility weights  
29 will be measured on a 0 to 1 scale where 1 represents a state of perfect health and 0 represents  
30 death.

### 31 *Estimated Sample Size*

32 The Glick sample size formula<sup>19</sup> has been used to estimate the sample size required for each of  
33 the TeleStroke and non-TeleStroke groups for this study to have 95% confidence with 80% study  
34 power. It is assumed that both groups will have equivalent standard deviation for cost and QALY,  
35 and equivalent sample sizes. The expected variations between the TeleStroke and non-  
36 TeleStroke groups have been sourced from previous cost-effectiveness analysis in the rural and  
37 remote context by Nelson et al<sup>10</sup> and Whetten et al<sup>7</sup>.

1 Edney et al in 2017 calculated a reference willingness to pay of AU\$28,033 per QALY gained and  
2 suggested that new technologies with ICER above AU\$40,000 per QALY gained was  
3 recommenced for public funding<sup>20</sup>. Assuming the WA sample has equivalent variations in  
4 average resource use and QALY gained between the TeleStroke and non-TeleStroke groups, 607  
5 individuals presenting with acute stroke episodes is required for each of the TeleStroke and non-  
6 TeleStroke groups if the public sector's willingness to pay is AU\$28,033 per QALY gain. This  
7 estimate of sample size would be 482 individuals if this willingness to pay is AU\$40,000.

## 8 Analysis

### 9 *Base case analysis and regression*

10 Baseline characteristics and clinical and functional outcomes of the patients in the before  
11 TeleStroke and after TeleStroke groups will be summarised by stroke subtypes. Differences in  
12 resource use and costs between the two groups will be tested using two-sample t-test (or non-  
13 parametric equivalents) and Chi square tests for continuous and categorical variables,  
14 respectively. The mean costs of resource use in each care pathways in the decision tree and the  
15 difference in costs between the two groups will be calculated with 95% confidence interval.

### 16 *Incremental cost-effectiveness*

17 The primary comparison is between the TeleStroke and non-Telestroke groups and an overall  
18 incremental cost-effectiveness ratio (ICER) will be calculated using the formulae below at  
19 hospital discharge and at 90-180 day.

20 The first set of ICER will be calculated using the mRS as the effectiveness measure using the  
21 following:

$$\frac{\text{Cost TeleStroke} - \text{Cost no TeleStroke}}{\text{mRS at discharge in TeleStroke} - \text{mRS at discharge in no TeleStroke}}$$

22 The second set of ICER will be calculated using QALY as the main outcome measure using the  
23 following:

24

25

26

$$\frac{\text{Cost TeleStroke} - \text{Cost no TeleStroke}}{\text{QALY TeleStroke} - \text{QALY no TeleStroke}}$$

27

28 Subject to sufficient statistical power, a series of sub-group analyses will be performed to assess  
29 whether the cost and effectiveness association is dependent on a third variable. The initial list of  
30 sub-analyses is as follows and the final list will be guided by findings from the qualitative phase  
31 of the study:

- 32 1. Gender
- 33 2. Establishment
  - 34 a. Busselton Health Campus
  - 35 b. Bunbury Health Campus

- 1 c. Albany Health Campus
- 2 d. Geraldton Hospital
- 3 e. Kalgoorlie Health Campus
- 4 f. Northam Hospital
- 5 3. Recurrence: stroke recurrence categories
- 6 a. First ever stroke
- 7 b. Recurrent stroke <255 days (Western Australian median time to first stroke
- 8 recurrence from first-ever stroke) <sup>21</sup>
- 9 c. Recurrent stroke >255 days
- 10 4. Rehabilitation post index presentation
- 11 5. Haemorrhagic stroke patients who underwent hemispherectomy
- 12 6. Changes in Emergency Care Capability Framework (ECCF) domain achievement

13 The model results will provide estimates for the ICER considering health outcome and costs at  
14 discharge and at 90-180 days post discharge. The results of the economic evaluation including  
15 the sub-group and sensitivity analyses will be presented in terms of point estimates, cost-  
16 effectiveness planes and cost-effectiveness acceptability curves.

17 The stroke sub-types will be compared on the basis of incremental net monetary benefits. The  
18 net monetary benefit of the stroke specialist telehealth consultations with or without CT scans  
19 will be calculated as: the mean QALY multiplied by the acceptable threshold values for the QALY  
20 (add reference), minus the mean cost of the TeleStroke Programme and CT scans. The threshold  
21 value should be interpreted as the monetary value of a QALY.

## 22 *Sensitivity Analysis*

23 Sensitivity analysis will be performed to identify changes to ICER under a range of conditions.  
24 One-way analysis will be performed initially on varying the following variables: changes in  
25 TeleStroke consultation rates, changes in door to image time, changes in thrombolysis and MT  
26 numbers, changes in rate of transfer to CT sites, and changes in other time-sensitive outcomes  
27 listed above. The variables for inclusion in the multi-variate sensitivity analysis will be decided  
28 based on findings from the semi-structured interviews and preliminary quantitative analysis of  
29 the administrative datasets.

## 30 **Implementation Factors to Inform Future Expansion of Acute TeleStroke Programme Delivery** 31 **in Western Australia**

32 A qualitative data collection is incorporated into the study design to provide a robust evidence  
33 base to support the interpretation of findings from the effectiveness and cost-effectiveness  
34 studies described above. Guided by a modified consolidated framework of implementation  
35 research (mCFIR), this data collection is expected to provide a subsidiary evidence base informing  
36 the future development and implementation of the WA Acute TeleStroke Programme across  
37 WACHS.

38 The Modified Consolidated Framework for Implementation Research (mCFIR)

39 The Consolidated Framework for Implementation Research (CFIR) <sup>22 23</sup> has been chosen as the  
40 underpinning interpretative framework to guide the qualitative study (including design of

1 interview protocol) and the final interpretation of the drivers of cost-effectiveness to adequately  
2 capture the complex nature of rural and remote health service delivery. As the focus of this  
3 research is on factors enabling and barring the successful integration of telehealth into clinical  
4 service implementation, the Finch, Mair et al theoretical constructs of normalization process  
5 theory (NPT)<sup>24</sup> will add the system integration dimension and theoretical content. Key concepts  
6 in the MAST domains of preceding consideration, safety, patient perspectives, organisational,  
7 socio-cultural, ethical and legal aspects<sup>13</sup> will also be mapped to the above ensuring coherence  
8 with the previous experience in telehealth evaluation. The resultant modified Consolidated  
9 Framework for Implementation Research (mCFIR) constructs will provide the initial categories in  
10 the qualitative analysis, and will be iteratively applied throughout the interpretive phase of the  
11 research.

## 12 Construction of interview guide

13 An interview guide has been developed based on the initial evaluation of the WA Acute  
14 TeleStroke programme implementation and impact within WACHS. Different sets of questions  
15 have been developed for the staff in the WACHS central office involved in the WACHS wide  
16 planning and implementation of the programme, programme sites with and without established  
17 pathways for stroke care. The draft interview protocol was reviewed by three stroke  
18 coordinators and senior managers within the WACHS Innovation and Development directorate.

## 19 Participant recruitment and the interview process

20 The aim of the qualitative component of this study is to explore and explain the factors impacting  
21 implementation of clinical telehealth strategies in rural and remote WA and the extent of their  
22 integration into routine clinical service delivery. The initial WACHS staff participants (seed  
23 participants) will be clinicians, programme administrators who have been involved in the  
24 commencement and implementation of the WA Acute TeleStroke Programme. The seed  
25 participants include senior leaders and managers, regional stroke coordinators, the neurology  
26 registrar. A snowball sampling technique will be used to identify and recruit further clinicians and  
27 health consumers to participate the study.

28 The semi-structured interviews will be conversational and interview protocol is designed for use  
29 as a guide to ensure consistent coverage of topic areas. Instead of asking the exact questions to  
30 every participant, the prompts under the main questions will be used as check lists to ensure  
31 relevant themes are covered in the dialogues. Small focus groups of less than 3 staff may be used  
32 instead of one on one interview when required to meet the constraints of participants' schedules.

33 The interviews will be audio-recorded and transcribed verbatim and managed in NVivo. While  
34 the open coding is performed, notes will be taken under the modified CFIR domain and construct  
35 headings. Axial coding will then be performed to make interconnections between the emerging  
36 themes within each CFIR construct. These relationship will be pulled into a relational model of  
37 causal conditions, central phenomenon, context, intervening conditions, action/interaction  
38 strategies and consequences<sup>25</sup>. Selective coding will then be performed to connect the emerging  
39 themes to produce a discursive set of theoretical propositions on telehealth integration in clinical  
40 service delivery<sup>25</sup>. The simultaneous data collection and analysis process will continue until data  
41 saturation is reached for all relevant constructs in the modified CFIR framework.

## 1 Drivers of Cost-effectiveness and Generation of Deliberative Dialogue

2 This case study will use two methods to gain insights into the drivers of cost-effectiveness. It will  
3 be an iterative process between the sub-group and sensitivity analyses part of the economic  
4 analysis, and the qualitative exploration. These two processes will commence as separate and  
5 concurrent parts in the case study. A constant comparison of early findings will take place where  
6 key themes emerging from the dialogues and interviews with key industry stakeholders, and  
7 health consumers is expected to offer explanation to the findings from the sub-group and  
8 sensitivity analyses. Any new categories or factors emerging from this constant comparison of  
9 findings will feed into the sub-group and sensitivity analyses as new sub-categories or factors for  
10 consideration in assessing the level of confidence of the ICERs calculated (whether the cost-  
11 effectiveness finding is robust when certain factors vary individually or in combination).

12 The understanding of the drivers of cost-effectiveness will include tacit knowledge of clinician,  
13 practitioners and consumers through deliberative dialogues generated during the final  
14 explanatory phase i.e. interpretive phase of the research. The deliberative dialogues generated  
15 in the interview and dissemination of early findings is likely to create an evaluative practice  
16 supporting the sharing of best practice and informing future rural and remote telehealth  
17 planning and policy in WA Health.

## 18 Patient and Public Involvement

19 A consumer representative was involved in the conceptualisation of this protocol.

## 20 ETHICS AND DISSEMINATION

21 Ethics approval for this case study has been granted from the Western Australian Country Health  
22 Service Human Research and Ethics Committee (WACHS HREC Project Reference Number  
23 RGS3076). Reciprocal approval granted from Curtin University Human Research Ethics Office  
24 (approval number HRE2019-0740). Findings will be disseminated publicly through conference  
25 presentation and peer-review publications. Interim findings will be released as internal reports  
26 to inform the TeleStroke Programme development.

## 27 REFERENCES

- 28 1. Stroke Foundation. Clinical Guidelines for Stroke Management. Melbourne Australia.2019.
- 29 2. Meyer BC, Raman R, Hemmen T, et al. Efficacy of site-independent telemedicine in the STRoKE DOC  
30 trial: a randomised, blinded, prospective study. *Lancet neurol* 2008;7(9):787-95. doi:  
31 [https://dx.doi.org/10.1016/S1474-4422\(08\)70171-6](https://dx.doi.org/10.1016/S1474-4422(08)70171-6)
- 32 3. Wang DZ, Rose JA, Honings DS, et al. Treating acute stroke patients with intravenous tPA: The OSF  
33 Stroke Network experience. *Stroke* 2000;31(1):77-81. doi: 10.1161/01.STR.31.1.77
- 34 4. Sairanen T, Soinila S, Nikkanen M, et al. Two years of Finnish Telestroke: thrombolysis at spokes equal  
35 to that at the hub. *Neurology* 2011;76(13):1145-52. doi:  
36 <https://dx.doi.org/10.1212/WNL.0b013e318212a8d4>
- 37 5. Yaghi S, Harik SI, Hinduja A, et al. Post t-PA transfer to hub improves outcome of moderate to severe  
38 ischemic stroke patients. *Journal of telemedicine and telecare* 2015;21(7):396-99. doi:  
39 <http://dx.doi.org/10.1177/1357633X15577531>
- 40 6. Barlinn J, Gerber J, Barlinn K, et al. Acute endovascular treatment delivery to ischemic stroke patients  
41 transferred within a telestroke network: a retrospective observational study. *International*



- 1 *journal of stroke : official journal of the International Stroke Society* 2017;12(5):502-09. doi:  
2 <http://dx.doi.org/10.1177/1747493016681018>
- 3 7. Whetten J, van der Goes DN, Tran H, et al. Cost-effectiveness of Access to Critical Cerebral Emergency  
4 Support Services (ACCESS): a neuro-emergent telemedicine consultation program. *Journal of*  
5 *Medical Economics* 2018;21(4):398-405. doi:  
6 <http://dx.doi.org/10.1080/13696998.2018.1426591>
- 7 8. Medeiros De Bustos E, Ohannessian R, Bouamra B, et al. Télé-médecine et accident vasculaire  
8 cérébral : « Rôle de la télé-médecine dans les accidents vasculaires cérébraux ». *Bulletin de*  
9 *l'Académie Nationale de Médecine* 2020 doi: <https://doi.org/10.1016/j.banm.2020.07.038>
- 10 9. Demaerschalk B, Switzer J, Xie J, et al. Cost-utility analysis of hub-and-spoke telestroke networks for  
11 the management of acute ischemic stroke from a societal perspective. *Neurology Conference:*  
12 *64th American Academy of Neurology Annual Meeting New Orleans, LA United States*  
13 *Conference Publication:* 2012;78(1 Meeting Abstract) doi: <http://dx.doi.org/10.1212/WNL.78.1>
- 14 10. Nelson RE, Saltzman GM, Skalabrin EJ, et al. The cost-effectiveness of telestroke in the treatment of  
15 acute ischemic stroke. *Neurology* 2011;77(17):1590-98. doi:  
16 <http://dx.doi.org/10.1212/WNL.0b013e318234332d>
- 17 11. Switzer J, Demaerschalk B, Xie J, et al. Cost-effectiveness of hub-and-spoke telestroke networks for  
18 the management of acute ischemic stroke from the Hospitals' perspective. *Circ Cardiovasc Qual*  
19 *Outcomes* 2013;78(1 Meeting Abstract) doi: <http://dx.doi.org/10.1212/WNL.78.1>
- 20 12. Adams R, Jones A, Lefmann S, et al. Utilising a collective case study system theory mixed methods  
21 approach: a rural health example. *BMC Medical Research Methodology* 2014;14(1):94. doi:  
22 10.1186/1471-2288-14-94
- 23 13. Kidholm K, Ekeland AG, Jensen LK, et al. A model for assessment of telemedicine applications: mast.  
24 *International journal of technology assessment in health care* 2012;28(1):44-51.
- 25 14. Castro FG, Kellison JG, Boyd SJ, et al. A methodology for conducting integrative mixed methods  
26 research and data analyses. *Journal of mixed methods research* 2010;4(4):342-60.
- 27 15. Andersen KK, Olsen TS, Dehlendorff C, et al. Hemorrhagic and ischemic strokes compared: stroke  
28 severity, mortality, and risk factors. *Stroke* 2009;40(6):2068-72.
- 29 16. Nelson RE, Okon N, Lesko AC, et al. The cost-effectiveness of telestroke in the Pacific Northwest  
30 region of the USA. *Journal of telemedicine and telecare* 2016;22(7):413-21.
- 31 17. Kazley AS, Simpson KN, Simpson A, et al. Optimizing the economic impact of rtPA use in a stroke belt  
32 state: the case of south Carolina. *American health & drug benefits* 2013;6(4):155.
- 33 18. Samsa GP, Reutter RA, Parmigiani G, et al. Performing Cost-Effectiveness Analysis by Integrating  
34 Randomized Trial Data with a Comprehensive Decision Model: Application to Treatment of  
35 Acute Ischemic Stroke. *Journal of Clinical Epidemiology* 1999;52(3):259-71. doi:  
36 [https://doi.org/10.1016/S0895-4356\(98\)00151-6](https://doi.org/10.1016/S0895-4356(98)00151-6)
- 37 19. Glick HA. Sample size and power for cost-effectiveness analysis (part 1). *Pharmacoeconomics*  
38 2011;29(3):189-98.
- 39 20. Edney LC, Afzali HHA, Cheng TC, et al. Estimating the Reference Incremental Cost-Effectiveness Ratio  
40 for the Australian Health System. *Pharmacoeconomics* 2018;36(2):239-52. doi:  
41 <http://dx.doi.org/10.1007/s40273-017-0585-2>
- 42 21. Lee AH, Somerford PJ, Yau KK. Risk factors for ischaemic stroke recurrence after hospitalisation. *Med*  
43 *J Aust* 2004;181(5):244-46.
- 44 22. Damschroder LJ, Aron DC, Keith RE, et al. Fostering implementation of health services research  
45 findings into practice: a consolidated framework for advancing implementation science.  
46 *Implement Sci* 2009;4(1):50.
- 47 23. Lu Y. Using Consolidated Framework for Implementation Research (CFIR) to Improve Information  
48 Governance (IG) Implementation in Healthcare. 2018
- 49 24. Finch TL, Mair FS, O'Donnell C, et al. From theory to 'measurement' in complex interventions:  
50 methodological lessons from the development of an e-health normalisation instrument. *BMC*  
51 *medical research methodology* 2012;12(1):69.
- 52 25. Strauss A, Corbin J. Basics of qualitative research: Sage publications 1990.

## 1     **AUTHOR'S CONTRIBUTIONS**

2     Christina Tsou drafted and provided the initial design of study. She has also coordinated input  
3     from the authorship to bring the work to publication. Delia Hendrie and Suzanne Robinson  
4     provided input on health systems and health economic methodology. James Boyd provided  
5     input on statistics and data linkage. Andrew Jamieson provided high level clinical practice  
6     perspective in the rural and remote Australia. Justin Yeung brings regional emergency medicine  
7     and telehealth application perspective to this project. Shruthi Kamath contributed specialist  
8     neurology knowledge and provided significant input in the methodology related to clinical  
9     effectiveness measures. Stephanie Waters and Karen Gifford provided programme  
10    implementation perspective and made significant contribution to the design of the interview  
11    protocol. All authors have reviewed the final manuscript and agreed to submit for publication.

## 12    **FUNDING STATEMENT**

13    This work has been supported by the Curtin University Health Research and Data Analytics Hubs  
14    through a Ph.D. scholarship, and in-kind contribution from the WA Country Health Services. It  
15    received no specific grant from any funding agency in the public, commercial or not-for-profit  
16    sectors.

## 17    **COMPETING INTERESTS STATEMENT**

18    All authors declare that they have no competing interest.

19

## 20    **FIGURES**

21    *Figure 1 WA Country Health Service Acute TeleStroke Case Study Methodology*

22    *Figure 2 Components of the WA Acute TeleStroke Case Study*

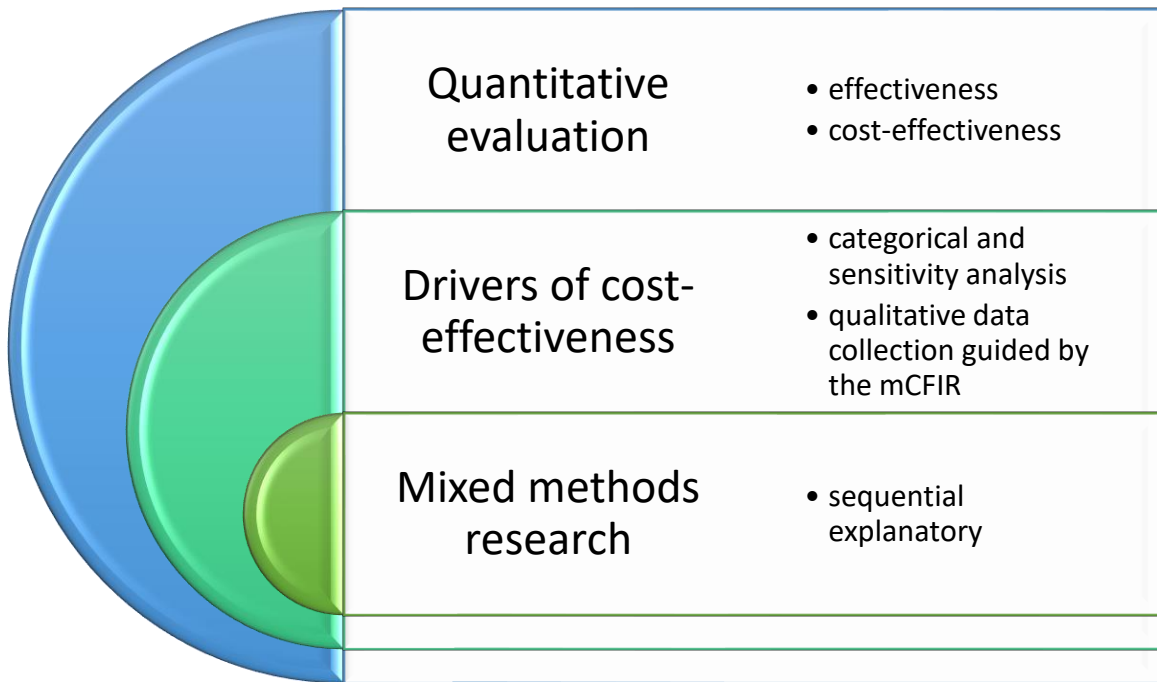

**Figure 1 WA Country Health Service Acute TeleStroke Case Study Methodology**

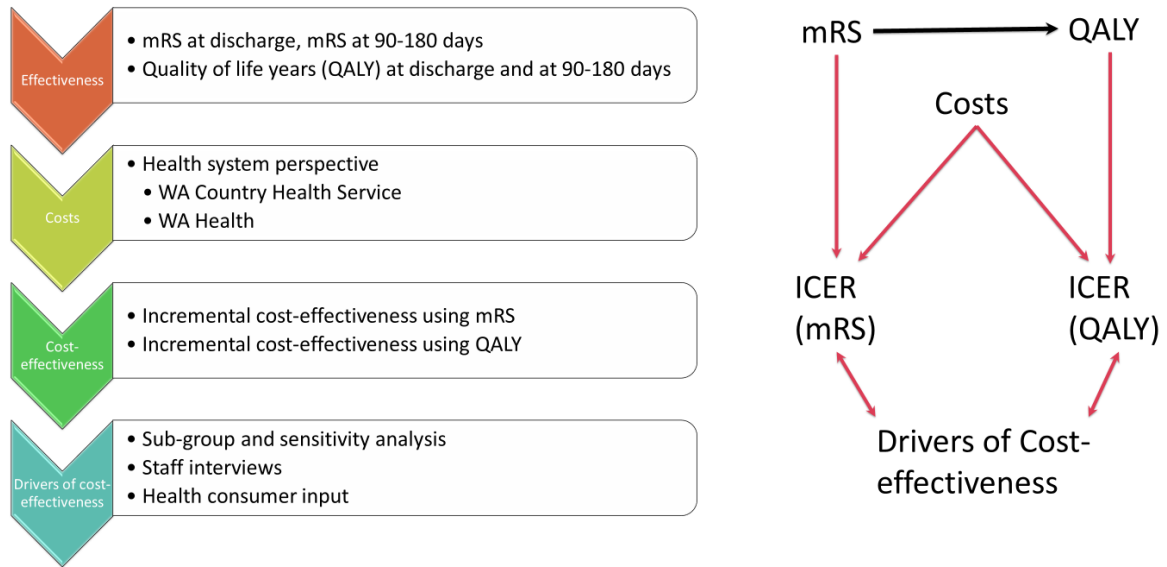

**Figure 2 Components of the WA Acute TeleStroke Case Study**
